# Supplementary material for: Are females more variable than males in gene expression? Meta-analysis of microarray datasets
Source: Springer Nature journal article supplement (doi:10.1186/s13293-015-0036-8), 2015-09-23

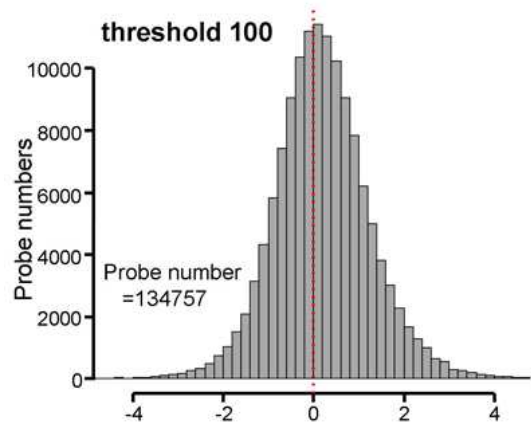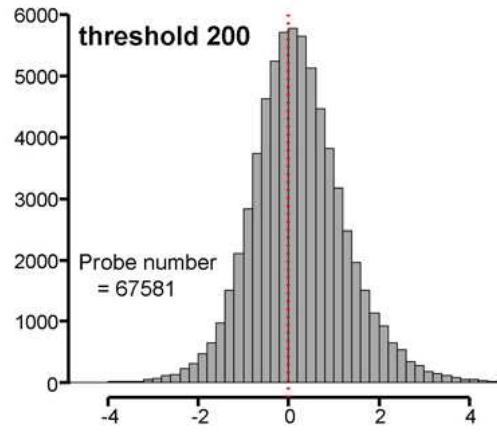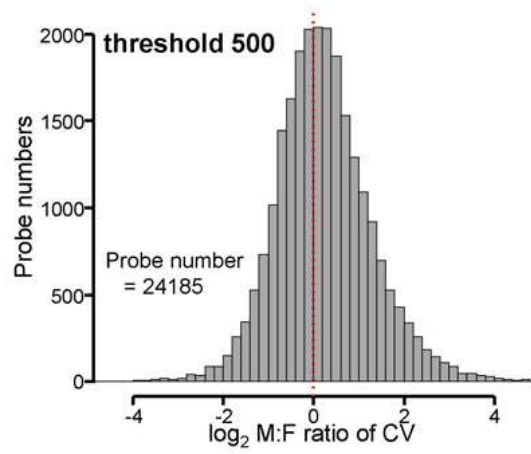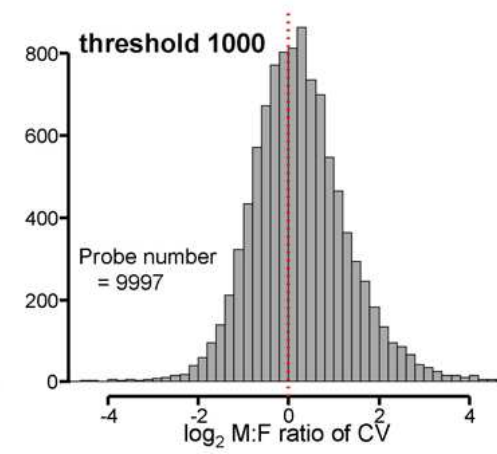

Supplement: 13293_2015_36_MOESM3_ESM.pdf [file 13293_2015_36_MOESM3_ESM.pdf]
